# Supplementary material for: Burden of First Osteoporotic Hip Fracture in Spain: A Prospective, 12-Month, Observational Study
Source: Springer Nature journal article supplement (doi:10.1007/s00223-016-0193-8), 2016-10-13
Supplement: MOESM1 [file 10874848]

**Burden of first osteoporotic hip fracture in Spain: a prospective, observational, 12-month study**

*Calcified Tissue International*

**Authors:** Jose Ramón Caeiro (1), Agustí Bartra (2), Manuel Mesa-Ramos (3), Íñigo Etxebarria (4), Jorge Montejo (5), Pedro Carpintero (6), Francesc Sorio (7), Sonia Gatell (7), Andrea Farré (7), and Laura Canals (7) on behalf of the PROA investigators

**Corresponding author:**

Dr. José Ramón Caeiro

Servicio de COT

Complejo Hospitalario de Santiago de Compostela

Calle Choupana s/n, ES-15702 Santiago de Compostela, A Coruña, Spain.

Phone: +34-609458500

Fax: +34-981950900

Email: jrcaeiro@telefonica.net

**Supplementary Table 1.** Changes over time in living arrangements

|                                       | Baseline Living Arrangement |                                       |              |                |         |            |
|---------------------------------------|-----------------------------|---------------------------------------|--------------|----------------|---------|------------|
|                                       | Own home alone              | Own home with partner / family member | Nursing home | Relatives home | Unknown | Total      |
|                                       | n (%)                       | n (%)                                 | n (%)        | n (%)          | n (%)   | n (%)      |
| <b>4 months</b>                       |                             |                                       |              |                |         |            |
| Own home alone                        | 37 (7.6)                    | 13 (2.7)                              | 2 (0.4)      | 2 (0.4)        | -       | 54 (11.1)  |
| Own home with partner / family member | 29 (6.0)                    | 200 (41.1)                            | 3 (0.6)      | 12 (2.5)       | -       | 244 (50.1) |
| Nursing home                          | 12 (2.5)                    | 18 (3.7)                              | 36 (7.4)     | 4 (0.8)        | -       | 70 (14.4)  |
| Relatives home                        | 4 (0.8)                     | 17 (3.5)                              | 0 (0.0)      | 14 (2.9)       | -       | 35 (7.2)   |
| Unknown                               | 11 (2.2)                    | 50 (10.3)                             | 14 (2.9)     | 8 (16.4)       | 1 (0.2) | 84 (17.2)  |
| Total                                 | 93 (19.1)                   | 298 (61.2)                            | 55 (11.3)    | 40 (8.2)       | 1 (0.2) | 487 (100)  |
| <b>12 months</b>                      |                             |                                       |              |                |         |            |

|                                       |           |            |           |          |         |            |
|---------------------------------------|-----------|------------|-----------|----------|---------|------------|
| Own home alone                        | 36 (7.4)  | 15 (3.1)   | 2 (0.4)   | 1 (0.2)  | -       | 54 (11.1)  |
| Own home with partner / family member | 28 (5.7)  | 183 (37.6) | 5 (1.0)   | 12 (2.5) | -       | 228 (46.8) |
| Nursing home                          | 10 (2.1)  | 15 (3.1)   | 26 (5.3)  | 5 (1.0)  | -       | 56 (11.5)  |
| Relatives home                        | 3 (0.6)   | 15 (3.1)   | 0 (0.0)   | 9 (1.8)  | -       | 27 (5.5)   |
| Unknown                               | 16 (3.3)  | 70 (14.4)  | 22 (4.5)  | 13 (2.7) | 1 (0.2) | 122 (25.1) |
| Total                                 | 93 (19.1) | 298 (61.2) | 55 (11.3) | 40 (8.2) | 1 (0.2) | 487 (100)  |

Percentages based on total number of patients (N=487)
